# Supplementary material for: Physiological and Transcriptomic Changes during the Early Phases of Adventitious Root Formation in Mulberry Stem Hardwood Cuttings
Source: MDPI journal article supplement (doi:10.3390/ijms20153707), 2019-07-29
Supplement: s1 [file s1]

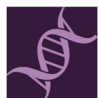

Supplementary Materials:

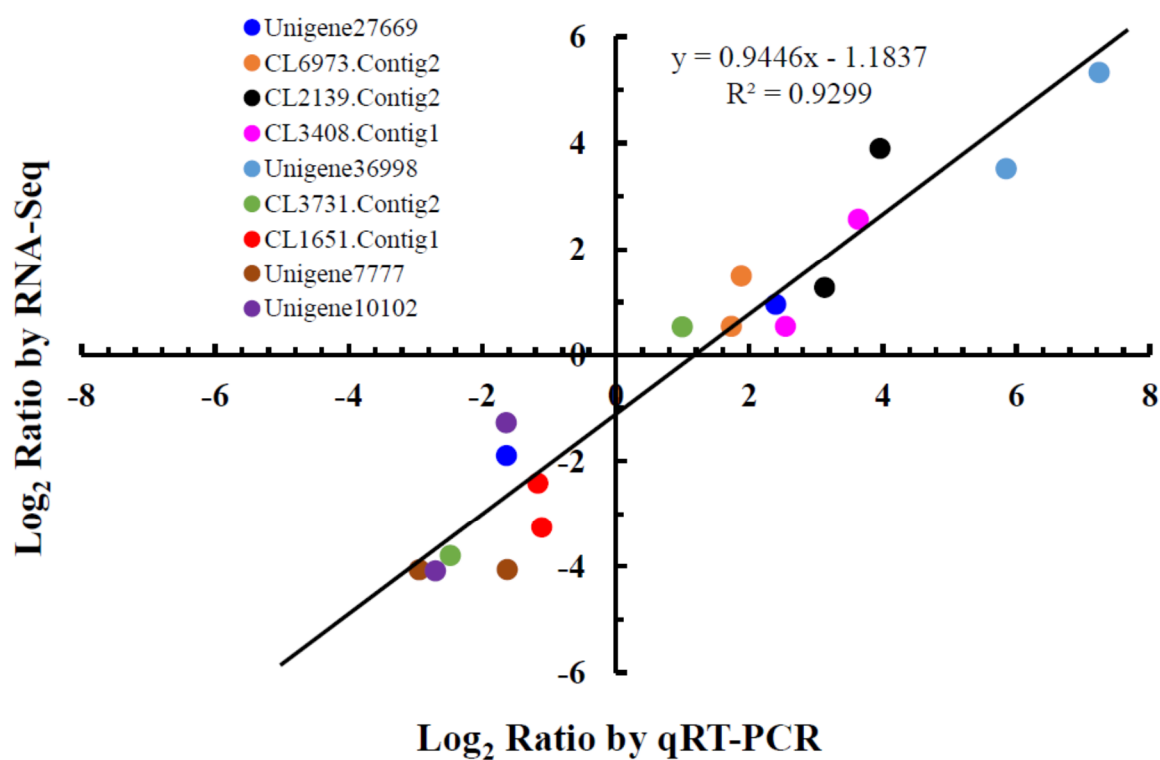

**Figure S1.** Correlations of RNA-seq results between the samples used in this study. The color code from green to red represents the Pearson values from 0 to 1.

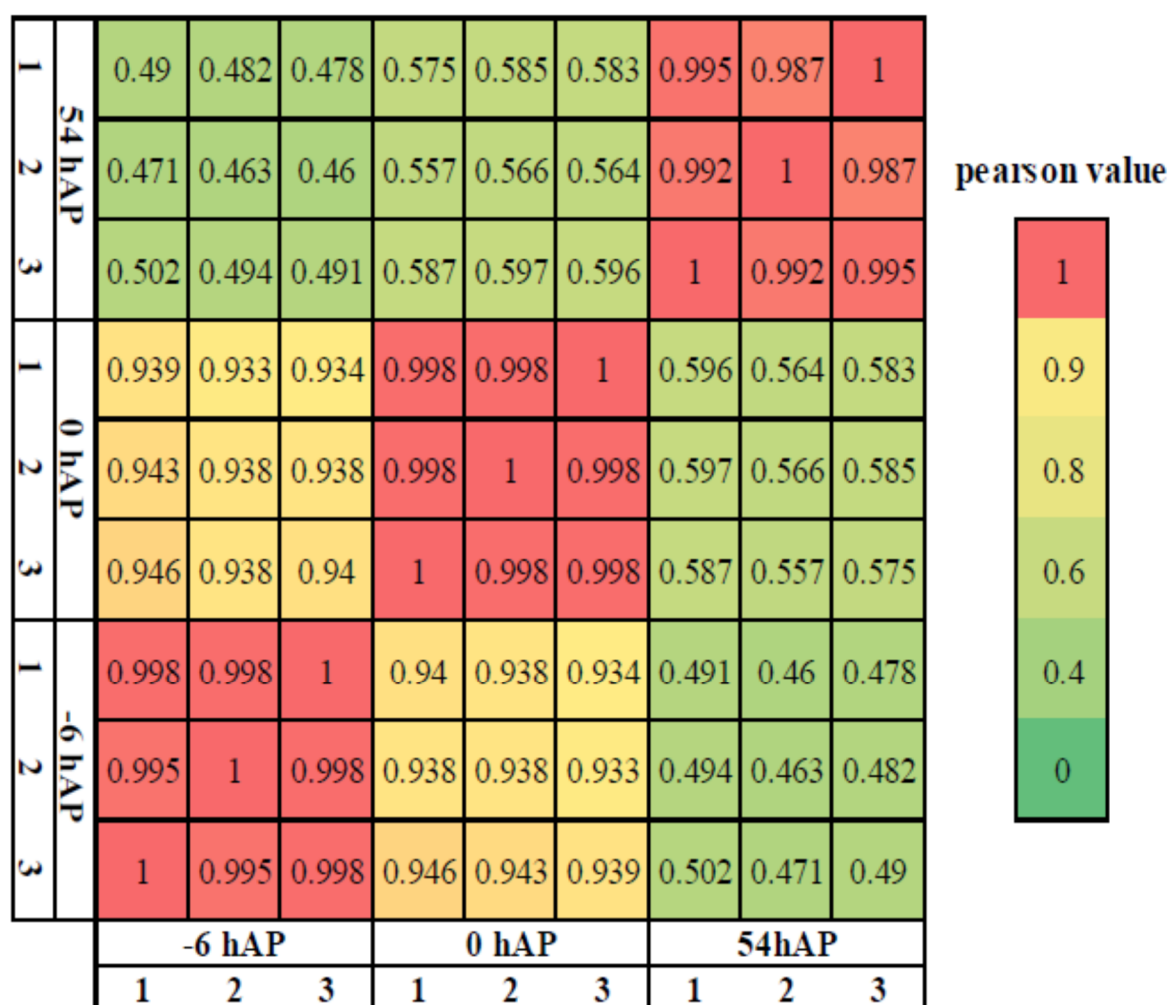

**Figure S2.** Correlation analysis between RNA-seq results and qRT-PCR analysis of nine DEGs during the early phases of AR formation in mulberry stem hardwood cuttings.

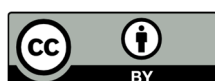

© 2019 by the authors. Submitted for possible open access publication under the terms and conditions of the Creative Commons Attribution (CC BY) license (<http://creativecommons.org/licenses/by/4.0/>).
